# Supplementary material for: Genome-Wide Correlation of DNA Methylation and Gene Expression in Postmortem Brain Tissues of Opioid Use Disorder Patients
Source: PubMed Central journal article supplement (PMC8598308; doi:10.1093/ijnp/pyab043), 2021-07-02
Supplement: pyab043_suppl_supplementary_figure_2.pdf [file pyab043_suppl_supplementary_figure_2.pdf]

Opioid receptors belong to the G protein-coupled receptor family, characterized by a seven-transmembrane span structure. Opioid receptors are expressed on primary sensory neurons in pain-modulating descending pathways,

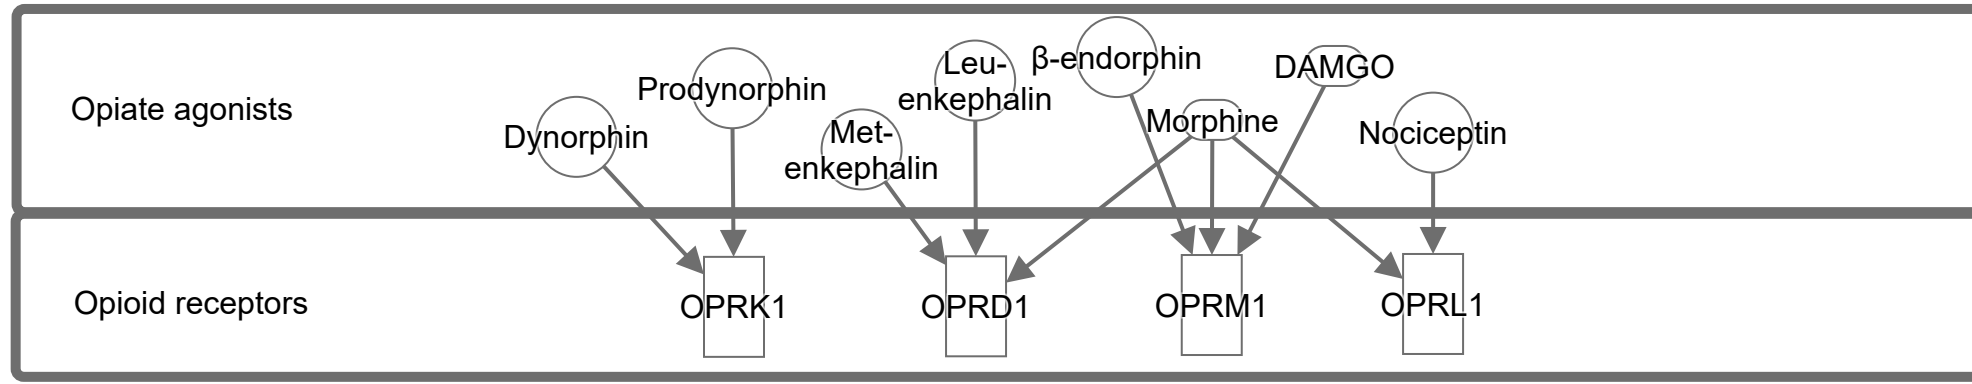

Ch.t = chronic treatment

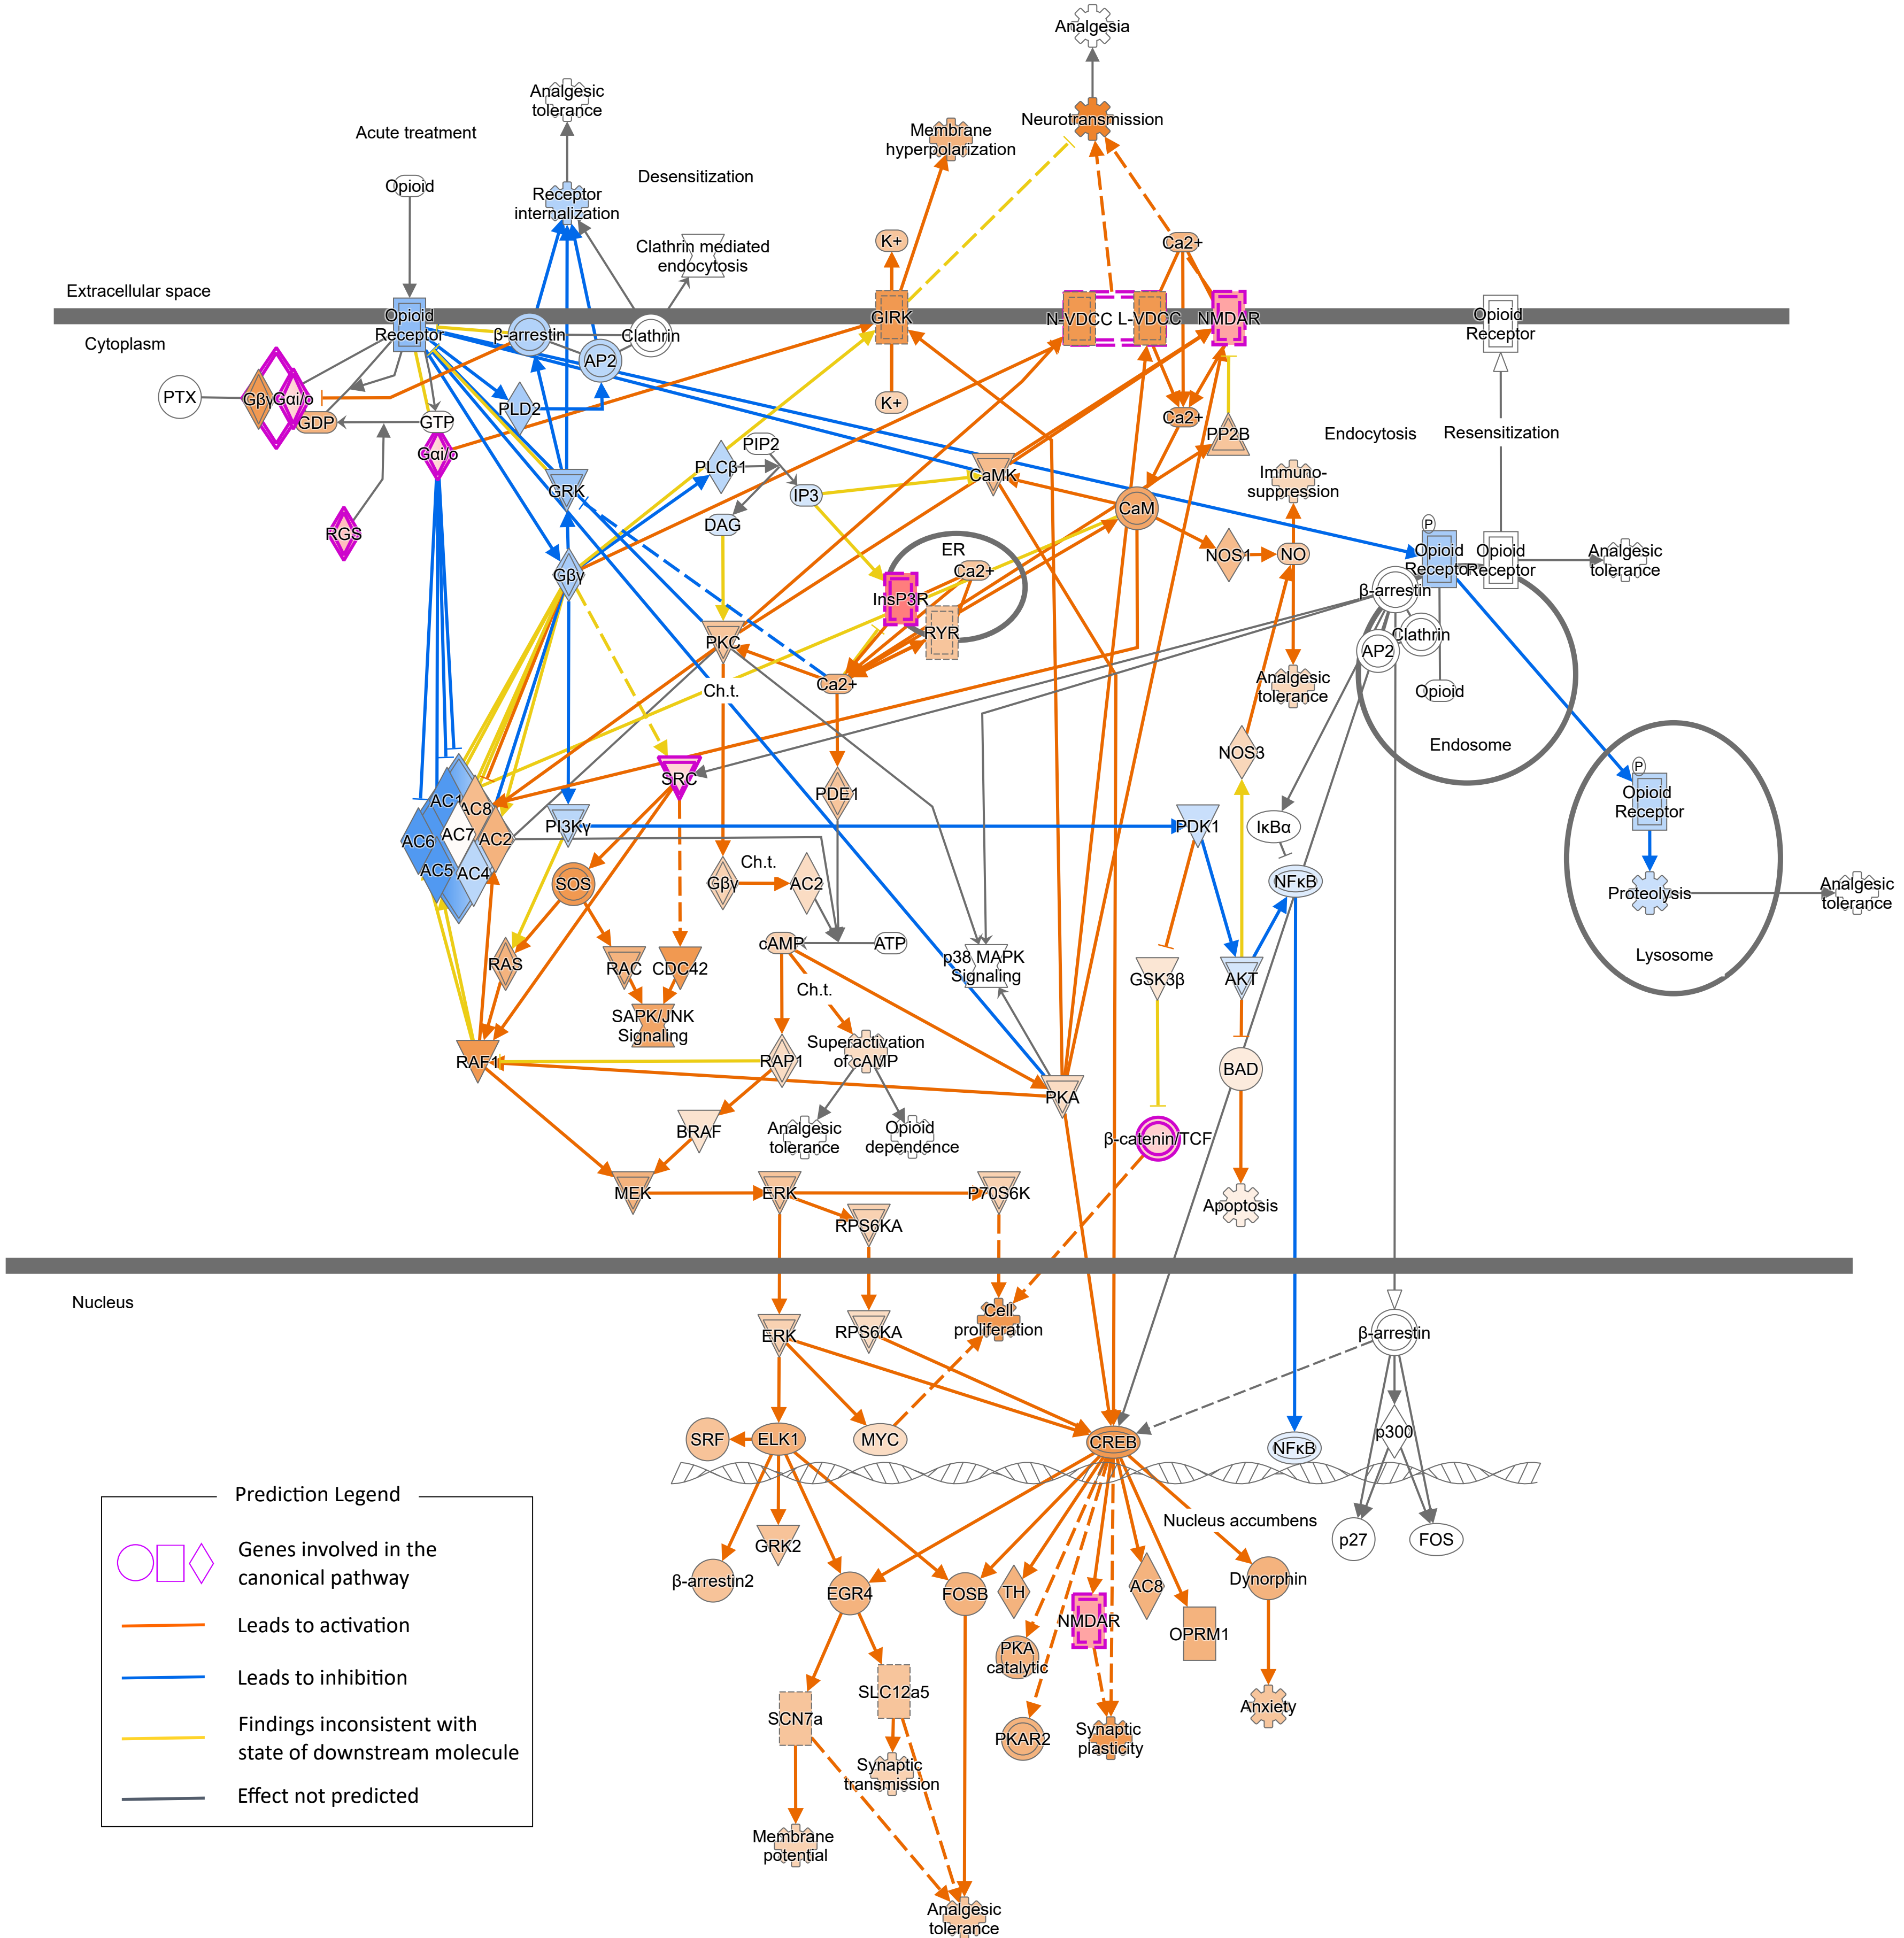

**Prediction Legend**

- Genes involved in the canonical pathway
- Leads to activation
- Leads to inhibition
- Findings inconsistent with state of downstream molecule
- Effect not predicted
