# Supplementary material for: Genome-Wide Correlation of DNA Methylation and Gene Expression in Postmortem Brain Tissues of Opioid Use Disorder Patients
Source: PubMed Central journal article supplement (PMC8598308; doi:10.1093/ijnp/pyab043), 2021-07-02

**A** Differentially expressed genes analysis

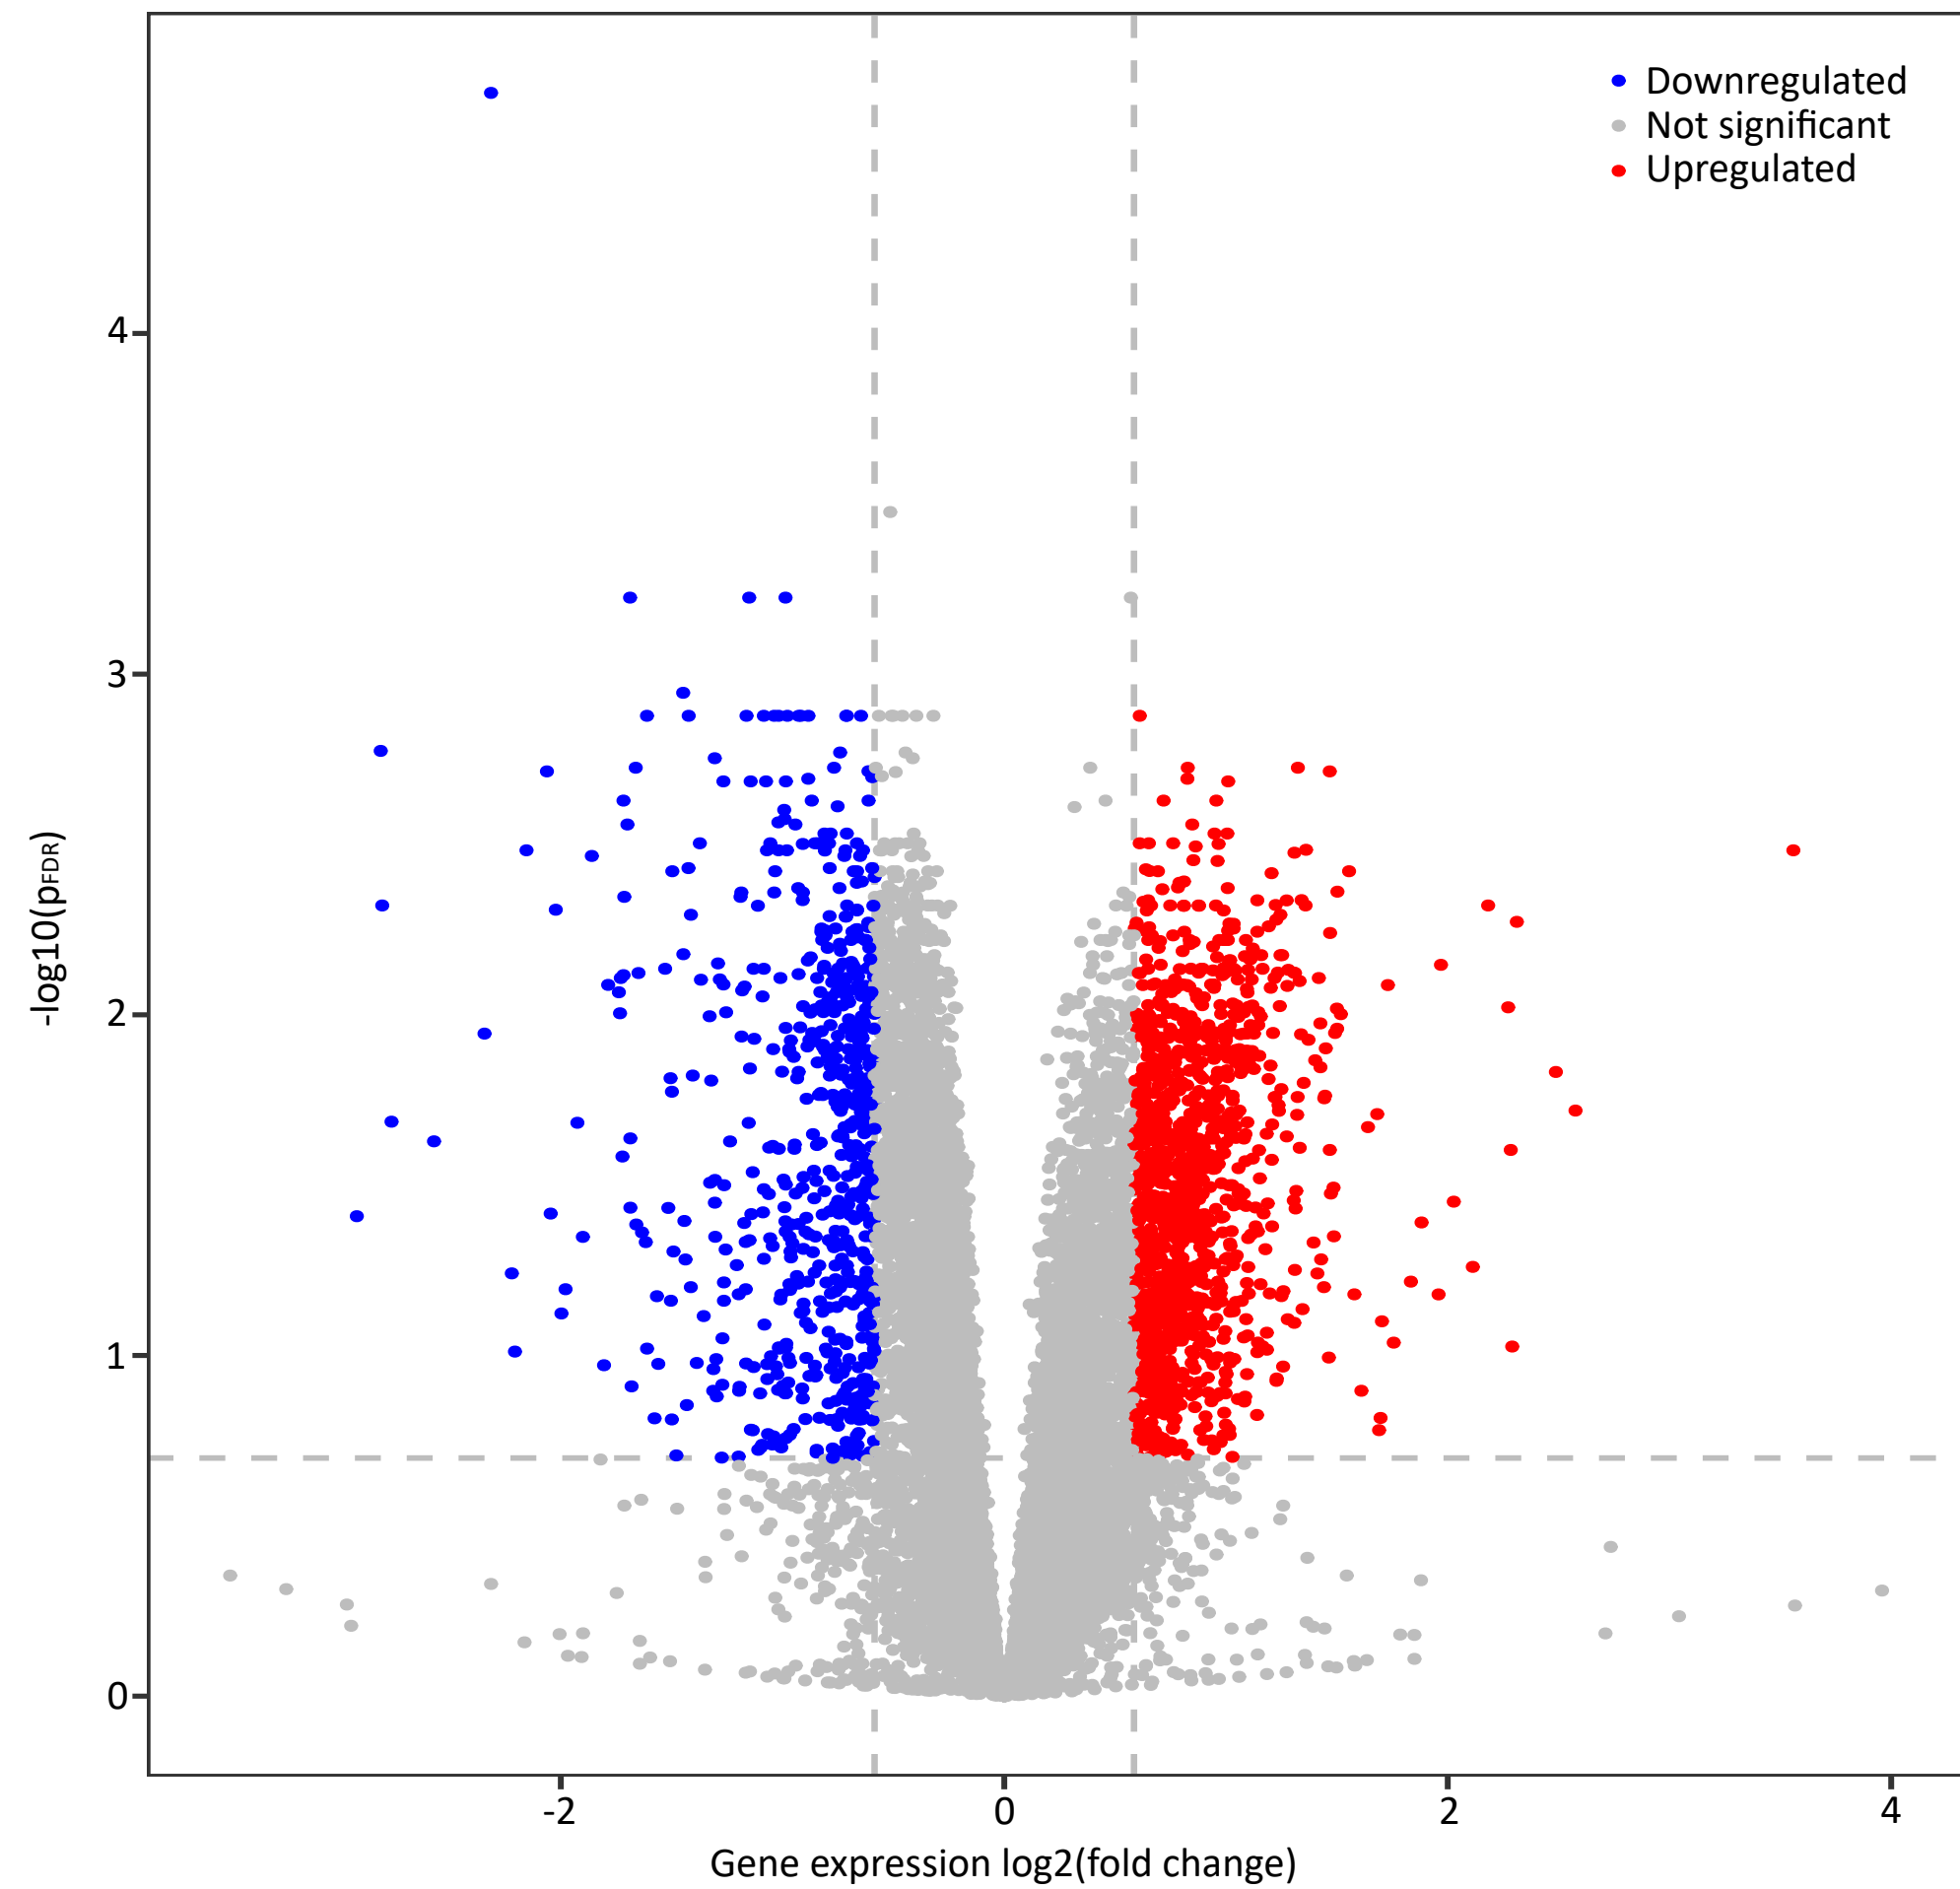

**B** Differentially methylated probes analysis

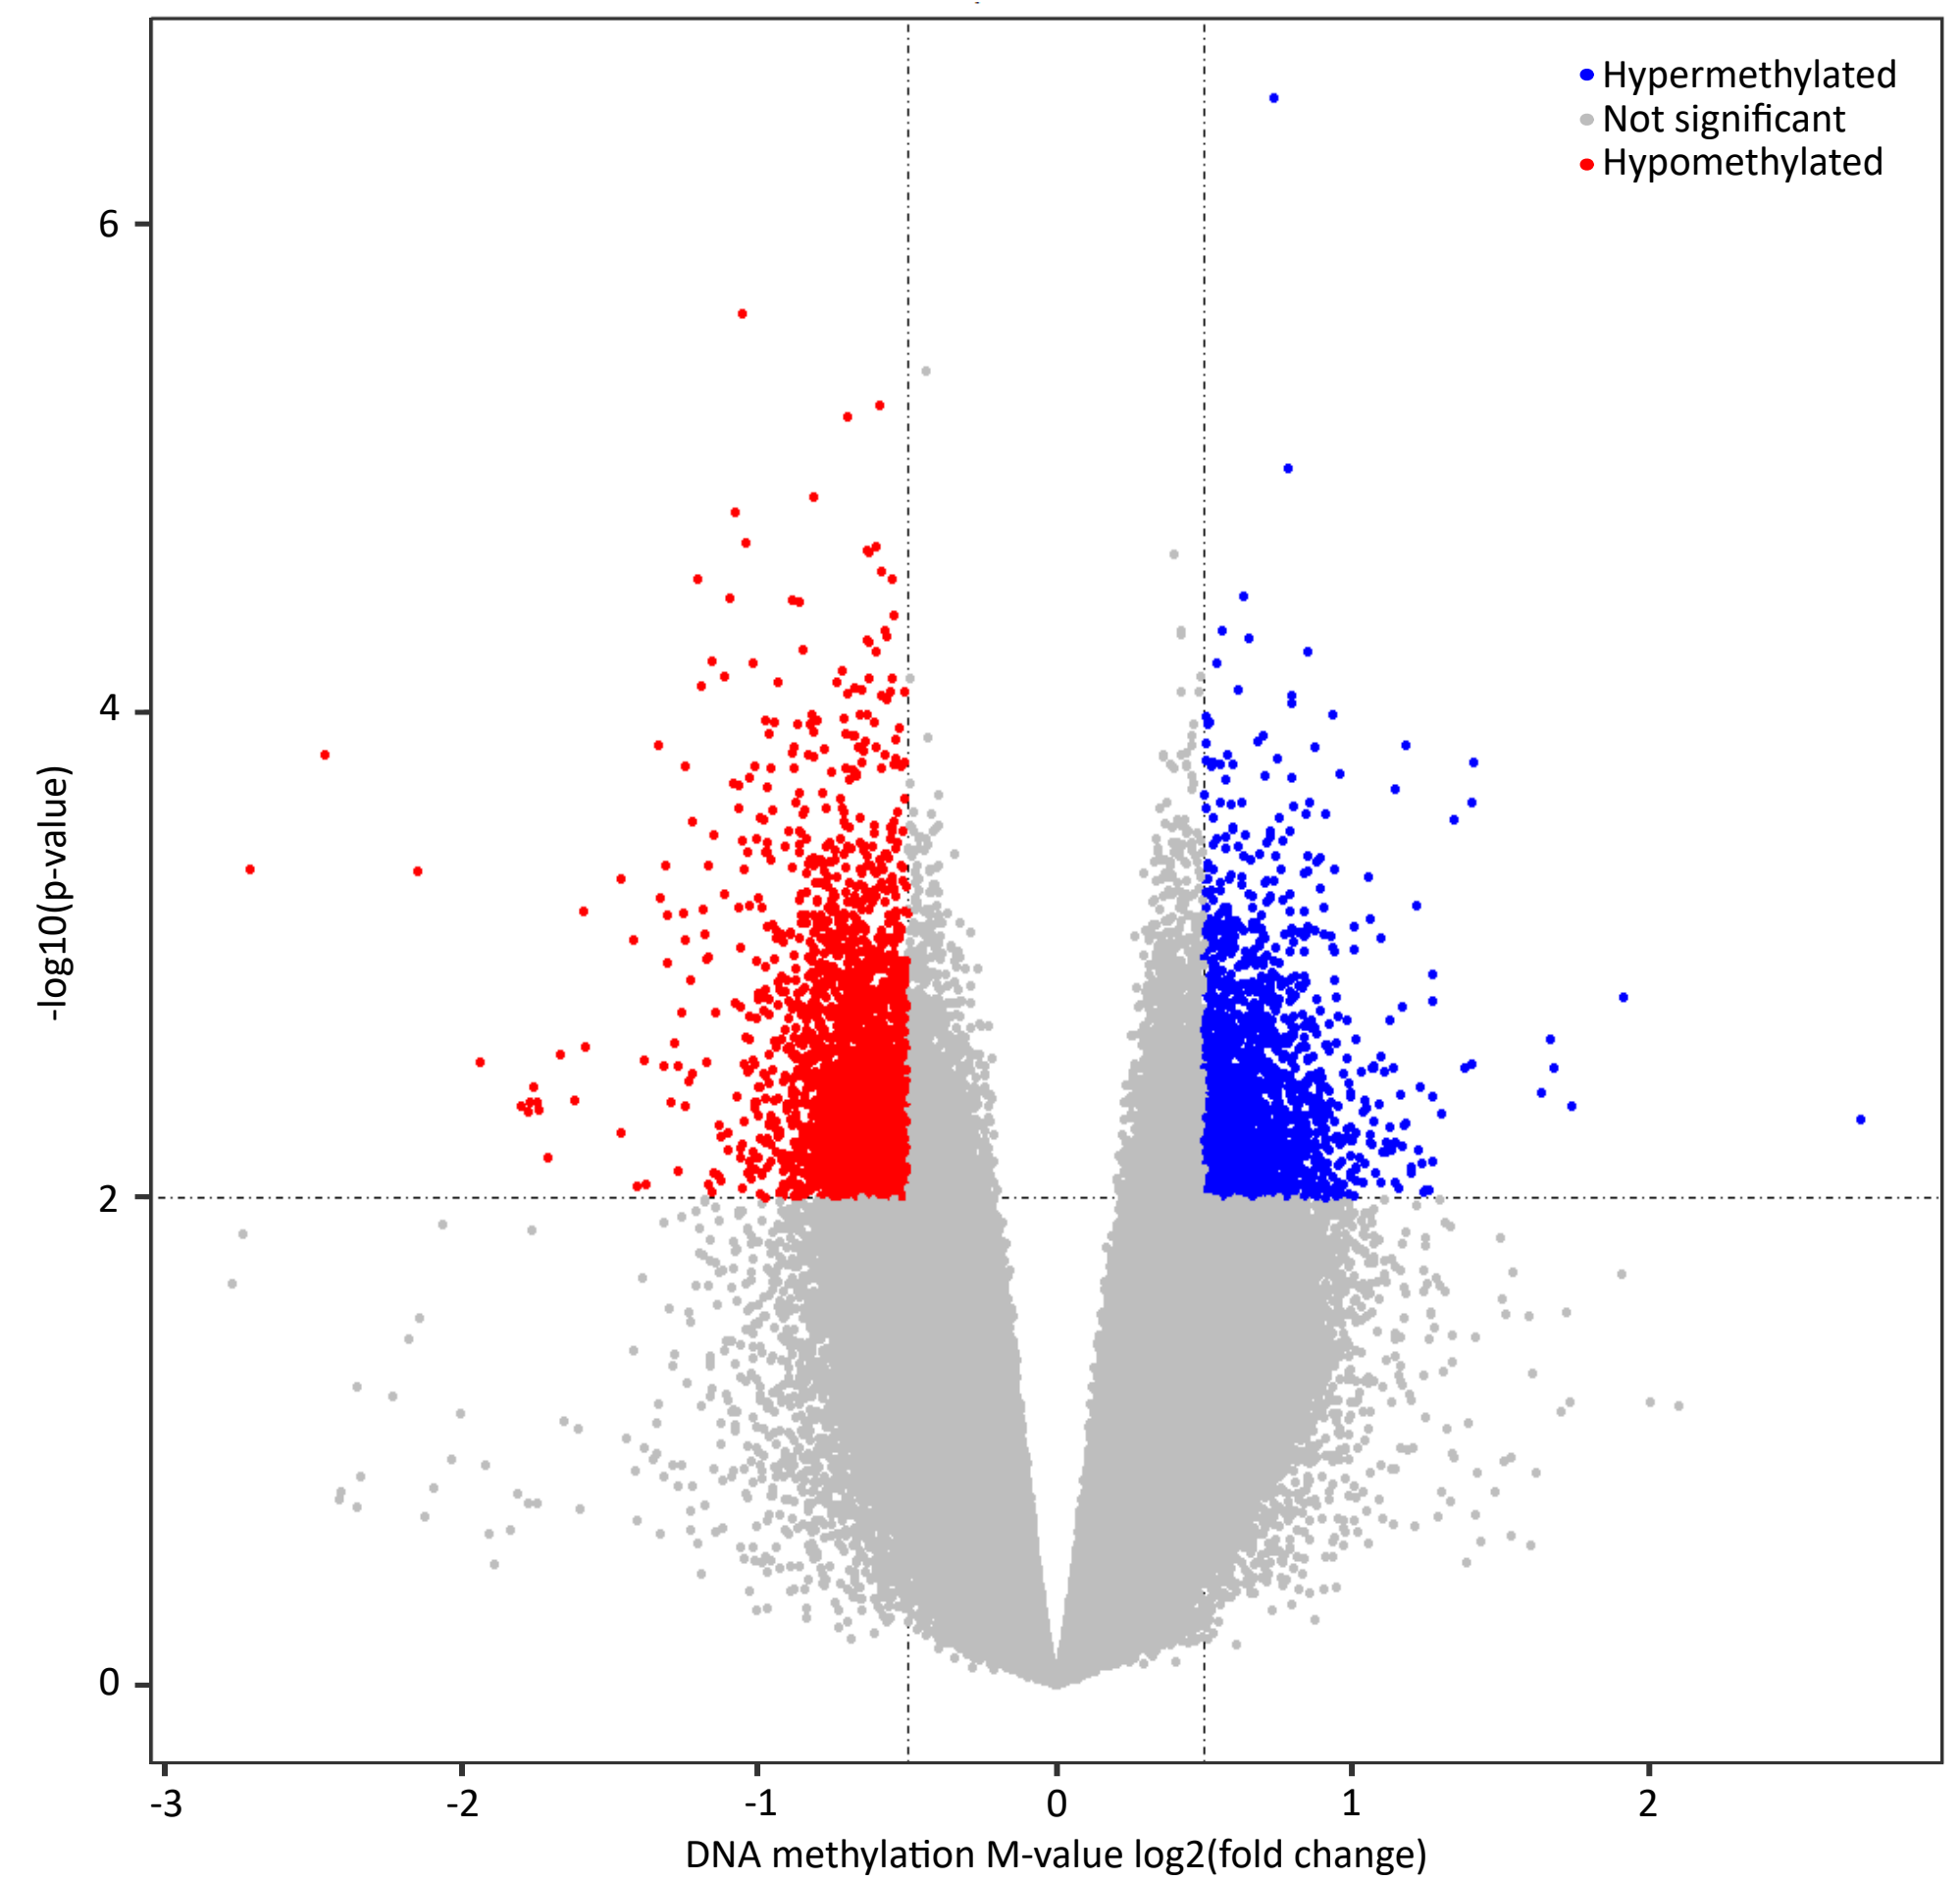

Supplement: pyab043_suppl_supplementary_figure_3.pdf [file pyab043_suppl_supplementary_figure_3.pdf]
