# Supplementary material for: Genome-Wide Correlation of DNA Methylation and Gene Expression in Postmortem Brain Tissues of Opioid Use Disorder Patients
Source: PubMed Central journal article supplement (PMC8598308; doi:10.1093/ijnp/pyab043), 2021-07-02
Supplement: pyab043_suppl_supplementary_figure_4.pdf [file pyab043_suppl_supplementary_figure_4.pdf]

CP: Neuroinflammation Signaling Pathway

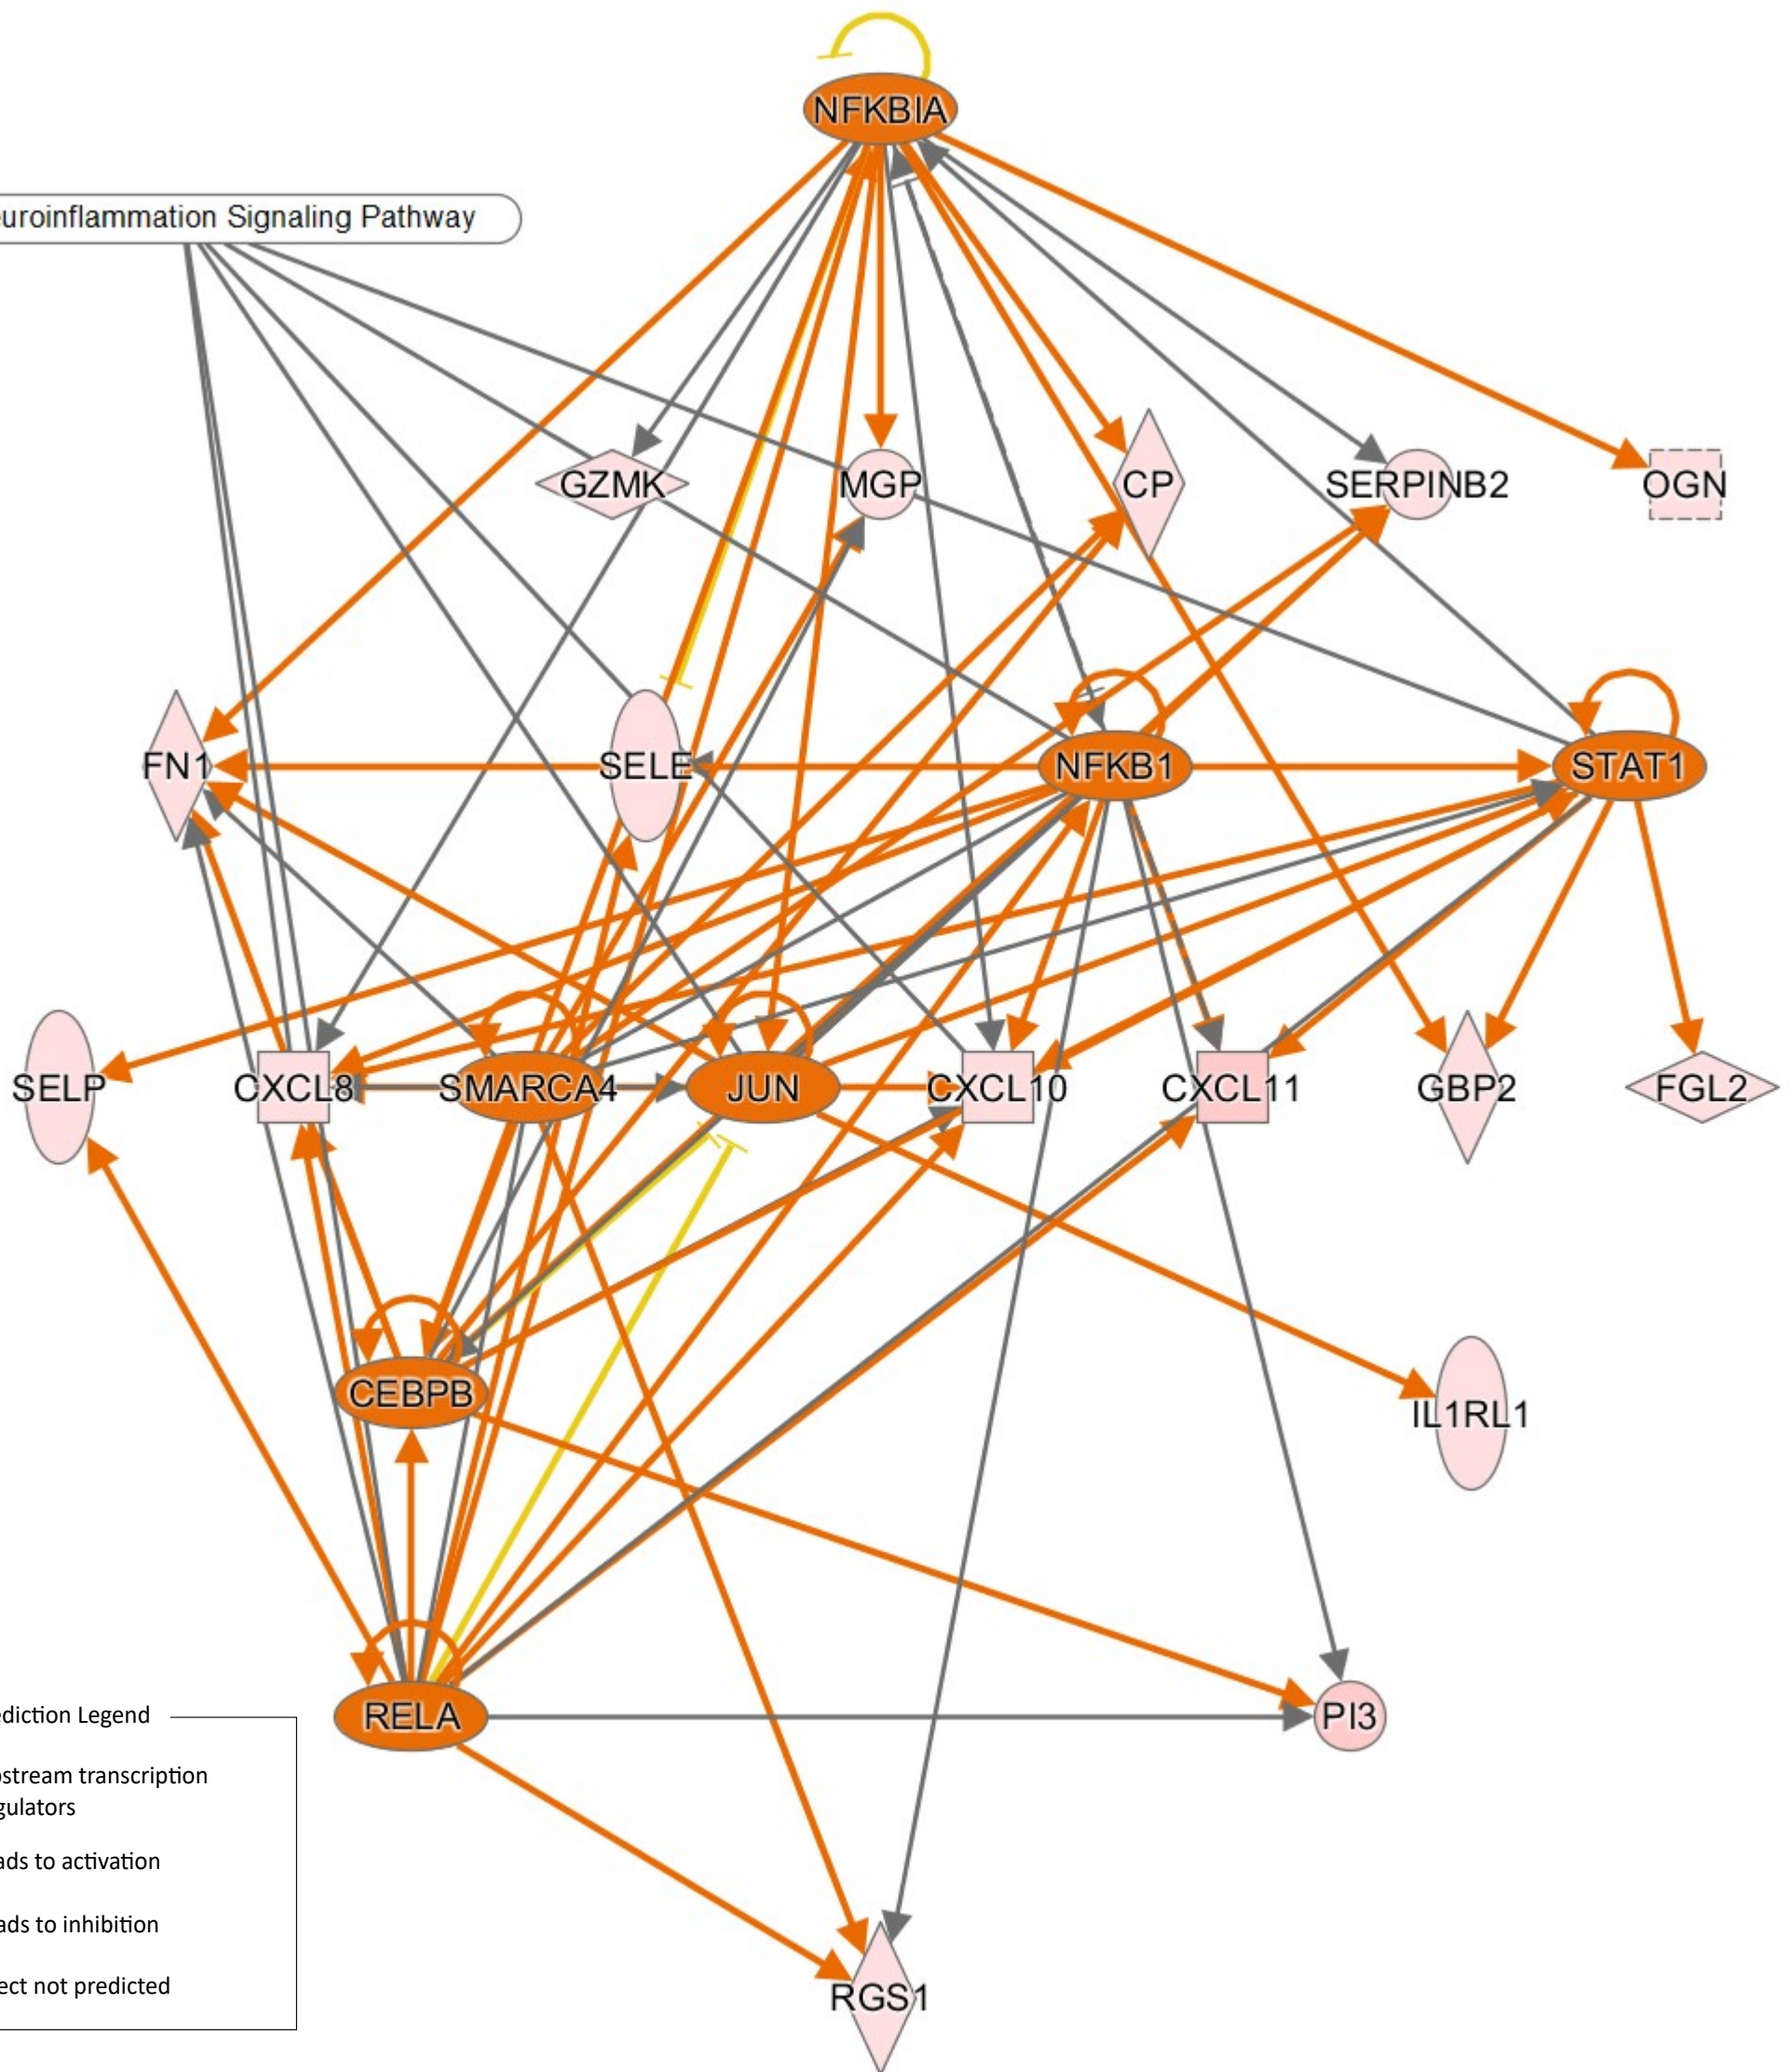

Prediction Legend

-  Upstream transcription regulators
-  Leads to activation
-  Leads to inhibition
-  Effect not predicted
